# Supplementary material
Source: publisher figshare collection journal article supplement (https://frontiersin.figshare.com/ndownloader/files/13866050)
Supplement: Supplementary file [file 13866050]

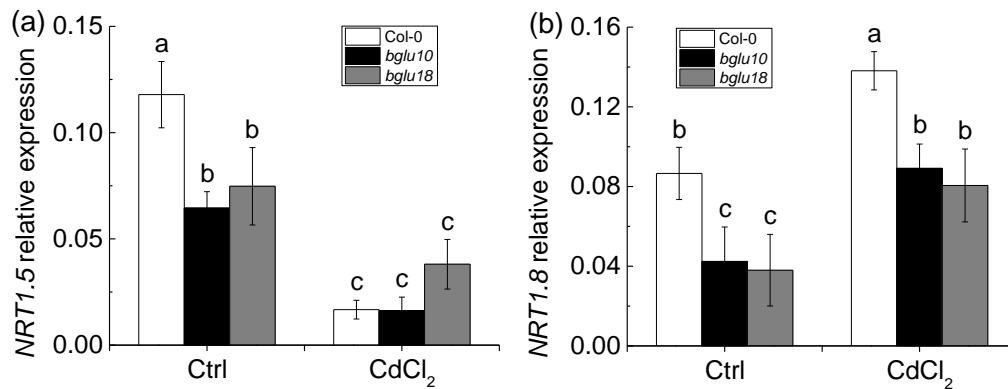

Supplementary Figure 1 Gene expression of *NRT1.5* and *NRT1.8* in roots under normal culture and Cd treatment. (a) Gene expression of *NRT1.5*. (b) Gene expression of *NRT1.8*. After 28 days of normal culture, 20  $\mu$ M Cd was treated for three days. Data represent means  $\pm$  SE (n=4). Bars with the same letter indicate no significant difference at P<0.05 level by the method of LSD.

**Supplemental Table 1 Gene-specific primers used for qRT-PCR assays in this study**

| Gene name                       | Forward<br>(5' $\rightarrow$ 3') | Reverse<br>(5' $\rightarrow$ 3') |
|---------------------------------|----------------------------------|----------------------------------|
| <i>AtNRT1.5</i>                 | TGGAGCGTTTCTCAGCGATT             | TCCATCATGGAATGTGAACCAC           |
| <i>AtNRT1.8</i>                 | TCTTCATCTTCGCATACAGGCGGT         | GCCATTATCGCAATCACAAGCCCA         |
| <i>SAND</i>                     | GATGAGGATGATGCTTCTACG            | CCTGAGCGTTGTATCTTGGT             |
| <i>BnNRT1.5</i>                 | GATGAAGTCACGCCTTGCG              | GCAATGTTCGGTTGGTAACCC            |
| <i>BnNRT1.8</i>                 | GGGTATGGTGGTTATCAGCCC            | CGAAAGGAGCGATCCGAGG              |
| <i>BnACT7</i>                   | GCTGACCGTATGAGCAAAG              | AAGATGGATGGACCCGAC               |
| <i>BnEF1<math>\alpha</math></i> | GCCTGGTATGGTTGTGACCT             | GAAGTTAGCAGCACCCCTTGG            |
| <i>BnGDI1</i>                   | GAGTCCCTTGCTCGTTTCC              | TGGCAGTCTCTCCCTCAGAT             |
